# The reserve of joint torque determines movement coordination

Germain Faity<sup>1</sup>, \*Denis Mottet<sup>1</sup>, Simon Pla<sup>1</sup>, Jérôme Froger<sup>2</sup>.

1. EuroMov Digital Health in Motion, Univ Montpellier, IMT Mines Ales, Montpellier, France.
2. EuroMov Digital Health in Motion, Univ Montpellier, IMT Mines Ales, CHU de Nîmes, Physical Medicine and Rehabilitation, Le Grau du Roi, France.

Corresponding author: [denis.mottet@umontpellier.fr](mailto:denis.mottet@umontpellier.fr)

ORCID Germain Faity: <https://orcid.org/0000-0002-6855-8938>

ORCID Denis Mottet: <https://orcid.org/0000-0002-7564-5394>

ORCID Jérôme Froger: <https://orcid.org/0000-0002-6590-3820>

## Abstract

Humans coordinate biomechanical degrees of freedom to perform tasks at minimum cost. When reaching a target from a seated position, the trunk-arm-forearm coordination moves the hand to the well-defined spatial goal, while typically minimising hand jerk and trunk motion. However, due to fatigue or stroke, people visibly move the trunk more, and it is unclear what cost can account for this. Here we show that people recruit their trunk when the torque at the shoulder is too close to the maximum. We asked 26 healthy participants to reach a target while seated and we found that the trunk contribution to hand displacement increases from 11% to 27% when an additional load is handled. By flexing and rotating the trunk, participants spontaneously increase the reserve of anti-gravitational torque at the shoulder from 25% to 40% of maximal voluntary torque. Our findings provide hints on how to include the reserve of torque in the cost function of optimal control models of human coordination in healthy fatigued persons or in stroke victims.

## Key-Words

Stroke – Reaching – Non-use – Optimal Control – Cost function – Strengthening

## 1. Introduction

When reaching to grasp an object from a seated position, the body segments that bring the hand closer to the target are the trunk, arm and forearm. This kinematic chain is redundant so that, theoretically, the reaching movement can be achieved in an endless number of different patterns of coordination of the trunk, arm and forearm<sup>1</sup>. However, empirically, the reaching movement quasi exclusively relies on shoulder flexion and elbow extension<sup>2</sup>.

According to the optimal control framework, the CNS achieves goals at a minimal cost<sup>3</sup>. To coordinate body segments, the CNS minimises both error and effort<sup>4</sup>, where the error is task related and the effort includes internal costs<sup>5,6</sup>, such as minimum energy expenditure, minimum muscle fatigue or minimum sense of effort<sup>7</sup>. When reaching to grasp an object from a seated position, the CNS takes into account that the trunk is massive, with greater inertia than the upper arm and forearm, and with a larger lever arm that requires more torque to start and stop. Thus, when it can do otherwise, the CNS has no interest in recruiting the costly trunk within the coordination.

However, the CNS sometimes recruits the trunk. For example, the trunk is recruited when the target is too far away to be reached with the shoulder-elbow coordination<sup>8</sup>. Obviously, to minimise the error, one has to pay the price of a higher effort. More surprisingly, the trunk is also recruited when the target is not far away, typically in people suffering from hemiparesis following a stroke<sup>9,10</sup>, in children with and without cerebral palsy<sup>11</sup> or in fatigued healthy people<sup>12</sup>. Peeters *et al.* (2018) argue that it may be easier to accurately perform a reaching task in children or patients with cerebral palsy when the arm is not fully extended due to a smaller lever arm at the shoulder. Fuller *et al.* (2013) suggest a similar hypothesis for healthy subjects who begin to use trunk flexion after a fatigue protocol: Using the trunk would relieve the shoulder muscles by recruiting the trunk muscles. Hence, it is likely that the trunk is recruited to limit the torque at the shoulder joint. Doing so, the objective of the task would be pursued (*i.e.* bringing the hand closer to the target), while the effort would be better distributed and with greater torque reserve for the involved joints.

In this paper, we hypothesise that trunk recruitment becomes significant when the shoulder is too close to maximal voluntary torque. We test this hypothesis by comparing the coordination when the hand is unloaded versus when the hand is loaded at 75% of the maximum antigravity shoulder torque.

## 2. Methods

### 2.1. Participants

Twenty-six healthy participants (12 males, age  $21 \pm 3$  years, 3 left-handed, height  $1.73 \pm 0.09$  m, weight  $66.92 \pm 9.29$  kg, maximum voluntary force (MVF) of shoulder flexion  $65.32 \pm 19.50$  N.m) participated in this study. Participants were excluded if they had shoulder pain or any other problem that could affect the reaching task. Written informed consent was obtained from all participants before their inclusion. This study was performed in accordance with the 1964 Declaration of Helsinki. The Institutional Review Board of EuroMov at the university of Montpellier approved the study (IRB-EM 1901C).

### 2.2. Procedure

Participants had to reach a target with the side of their thumb nail. The target was table tennis ball fixed in front of the participant, just within the anatomical reaching distance for the hand<sup>13</sup>. The starting position was seated, feet on the ground, back in contact with the chair and forearm on the armrest. The reaching movement was assessed in  $2 \times 2$  conditions: spontaneous trunk use or restrained trunk use  $\times$  hand unloaded or hand loaded. In the spontaneous trunk use condition, participants had to reach the target at a natural pace, wait 1 second and return to the starting position. In the restrained trunk use condition, participants had to reach the target while minimizing trunk movement: the experimenter manually applied a light proprioceptive feedback on the participant's shoulders, as a reminder to minimise trunk movement. We did not use a belt to restrain the trunk in order to leave the participant free to use the trunk if necessary, and thus avoid task failure.

In both trunk conditions, participants performed 5 unloaded trials and 5 loaded trials, *i.e.*, carrying a dumbbell (figure 1). The assessed hand was chosen pseudo-randomly (12 left, 14 right) so that half of the participants performed the task with their dominant hand, and the other half with their non-dominant hand. In the hand unloaded condition, the weight of the arm without the dumbbell corresponded to 13.0% ( $\pm 3.7\%$ ) of the MVF of the shoulder. In the hand loaded condition, the weight of the arm including the dumbbell was set to 75.0% ( $\pm 5.5\%$ ) of the MVF of the shoulder.

The MVF of the shoulder was the maximum torque producible by the shoulder during an isometric shoulder flexion task against gravity, including arm weight. Seated participants had to hold a 2 kg dumbbell in front of them with the arm extended and pull up as much as possible for 3 seconds. The

dumbbell was linked with a static rope to a force sensor attached to the ground. Participants had to stay in contact with the backrest during the entire contraction. Any help of the contralateral arm was prohibited. Experimenter encouraged the participant verbally. We retained the maximum score over 3 trials separated with a rest time of 1 minute. Maximum antigravity shoulder torque was calculated based on the recorded maximum force and lever arm, plus the torque due to the weight of the arm during the task.

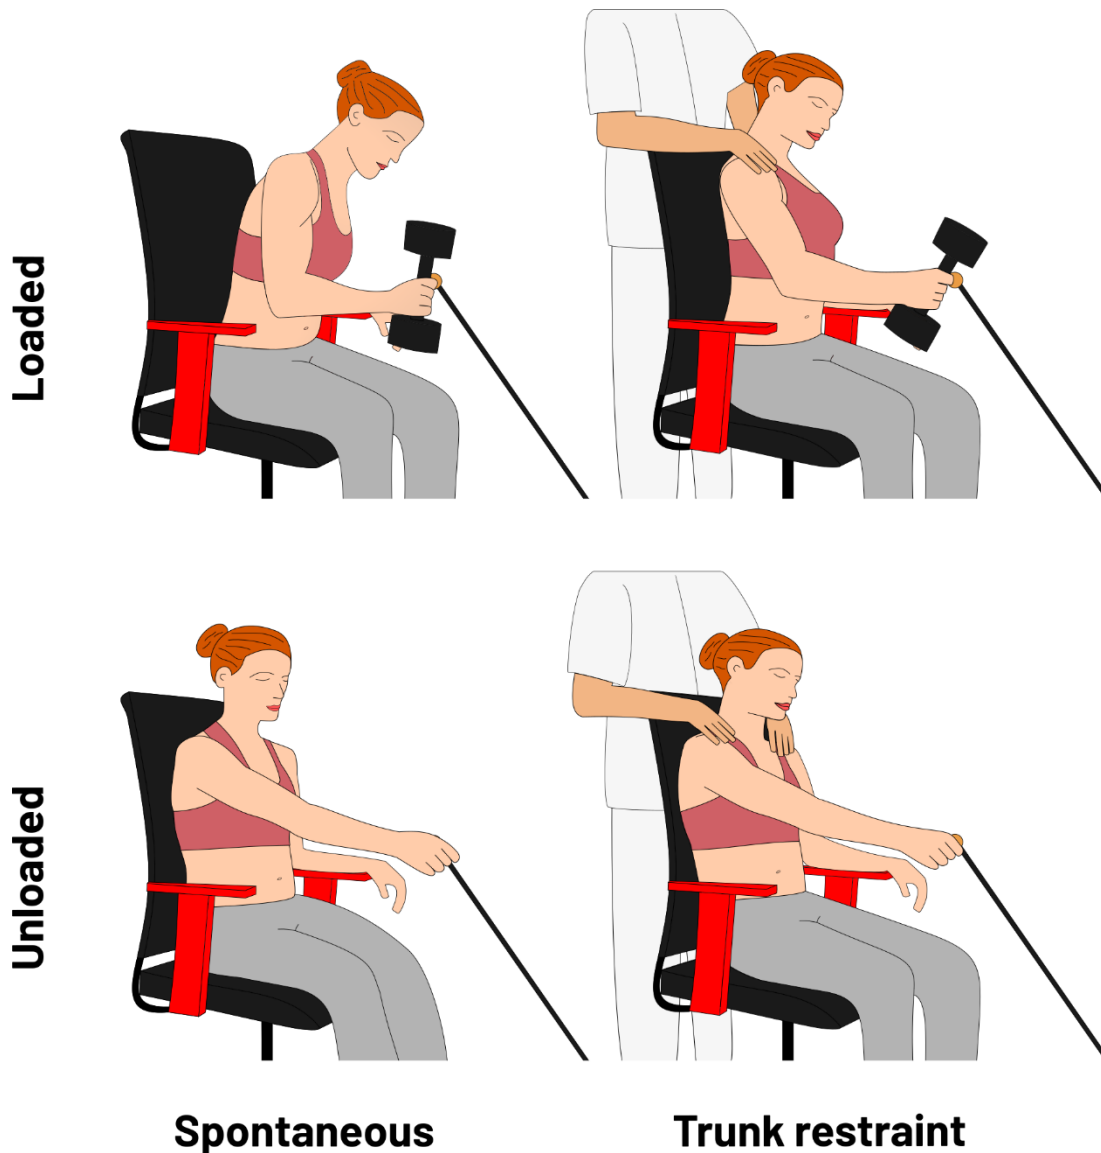

Figure 1. Schema of the four experimental conditions. In the loaded conditions (upper row), participants held a dumbbell which mass corresponded to 75% of their maximal voluntary shoulder force (MVF). In the unloaded conditions (lower row), participants had to reach the target without the dumbbell. In the spontaneous conditions (left column), participants had to reach the target in a natural way. In the trunk restraint conditions (right column), participants had to reach the target while minimising trunk movement.

### 2.3. Experimental setup

Movements were recorded at 100 Hz with 8 infrared optical cameras from the Vicon Motion Capture System (Vantage V5, lens 8.5 mm, Oxford Metrics, UK). VICON Nexus 2 software was used to save time series of each marker. The experimenter placed markers on the target and the manubrium, and for each body side on the 1<sup>st</sup> metacarpal, the lateral epicondyle of the humerus, the acromion process,

and the iliospinal. For each side, we corrected iliospinal marker position before data analysis to correspond at best to the anatomical centre of hips joints. Markers of both sides were needed to compute shoulder and trunk angles.

## 2.4. Kinematic analysis

Data analysis was performed with SciLab 6.0.2.

First, all position time series were low pass filtered at 5 Hz with a dual pass second order Butterworth filter.

Second, we computed the beginning and end of the reach. Because the goal of a reaching task is to bring the hand to the target, that is, to reduce the hand-to-target distance, what is important for task success is the hand-to-target Euclidean distance. The hand-to-target Euclidean distance summarises the 3D effector space into a 1D task space (where movement matters) leaving aside a 2D null space (where movement does not impact task success). We fixed the beginning of the movement ( $t_0$ ) when the Euclidean velocity of the hand in task space became positive and remained positive until the maximum velocity. The end of the movement ( $t_{final}$ ) was when the Euclidean distance to the target reached its minimum.

Third, we computed the reach length and the trunk recruitment. Reach length is the hand-to-target Euclidean distance at  $t_0$ . In order to know the normalised implication of the trunk to the reach, we computed trunk recruitment as the ratio between shoulder displacement and reach length. More precisely, trunk recruitment = (shoulder to target distance at  $t_0$  – shoulder to target distance at  $t_{final}$ ) / (hand to target distance at  $t_0$  – hand to target distance at  $t_{final}$ ). Over the 5 trials, the trial with the median trunk recruitment was retained for data analysis.

Fourth, antigravity shoulder torque was computed as the Euclidean norm of the 3D static torque against gravity at the final posture. In order to compute the static torque, the positions of centre of mass and the absolute weight of upper limbs were approximated from the height and weight of participants following De Leva's equations (1996). Our model considers the torques applied to the shoulder by the upper arm (shoulder to elbow link), the forearm and hand (elbow to hand link) and the dumbbell, as described in the equation 1.

$$antigravity\ shoulder\ torque = \sqrt{\vec{\tau}_{\{shoulder\}}^{\{upperarm\}}{}^2 + \vec{\tau}_{\{shoulder\}}^{\{forearmHand\}}{}^2 + \vec{\tau}_{\{shoulder\}}^{\{dumbbell\}}{}^2} \quad (1)$$

The torque applied to the shoulder by each component of the model was calculated as the cross product of the lever arm vector and the gravity vector of the component (equation 2).

$$\vec{\tau}_{\{shoulder\}}^{\{component\}} = \vec{r} \times \vec{F} \quad (2)$$

Where  $\vec{r}$  is the lever arm vector (a position vector from the shoulder to the centre of mass of the component) and  $\vec{F}$  is the gravity vector of the component. The equation can be developed as:

$$\vec{\tau}_{\{shoulder\}}^{\{component\}} = (\overrightarrow{Position}_{cm} - \overrightarrow{Position}_{shoulder}) \times (\vec{F}_g * Mass) \quad (3)$$

Where  $\overrightarrow{Position}_{cm}$  is the 3D position of the centre of mass of the component,  $\overrightarrow{Position}_{shoulder}$  is the 3D position of the shoulder joint,  $\vec{F}_g$  is the force of gravity and  $Mass$  is the mass of the component.

## 2.5. Statistical analysis

The statistical analysis was conducted using R 3.6.1 with *rstatix* and *stats* packages. Density plots and quantiles/quantiles plots revealed a violation of the normality assumption inside data groups. Therefore, all hypotheses were tested in a non-parametric way, using paired samples Wilcoxon signed rank tests. Because of the multiple comparisons, p-values were corrected by the method of Benjamini & Hochberg (1995). The significance level was set at .05 in all analyses. The effect size *r* was calculated as the Z statistic divided by the square root of the number of observations (Rosenthal *et al.*, 1994). Data are presented as median ( $\pm$  interquartile range).

## 3. Results

### 3.1. Increasing the weight of the arm raises trunk recruitment

Reaching in the spontaneous unloaded condition induced a recruitment of the trunk of 11% ( $\pm$ 4%) of reach length. Trunk recruitment increased to 27.5% ( $\pm$ 21%) when loaded ( $W = 0$ ,  $p < .001$ ,  $r = .87$ ). In the trunk restraint conditions, trunk recruitment could be reduced to 8% ( $\pm$ 5%) when unloaded ( $W = 22$ ,  $p < .001$ ,  $r = .72$ ), and to 12% ( $\pm$ 7%) when loaded ( $W = 0$ ,  $p < .001$ ,  $r = .87$ ) (figure 2a). The increase in trunk use was not different between subjects with the dominant side loaded and subjects with the non-dominant side loaded ( $W = 97$ ,  $p = .54$ ,  $r = .13$ ). These results indicate that handling a heavy dumbbell increases trunk recruitment during reaching. When asked, all participants were able to reduce trunk recruitment in the loaded condition.

### 3.2. Trunk recruitment reduces antigravity shoulder torque

Trunk restraint increased antigravity shoulder torque in the final posture by 8% when the hand is unloaded (spontaneous: 11.7 % ( $\pm$ 3.4 %); trunk restraint: 12.7 % ( $\pm$ 4.0 %);  $W = 351$ ,  $p < .001$ ,  $r = .87$ ) and by 23% in the loaded condition (spontaneous: 60.4 % ( $\pm$ 8.0 %); trunk restraint: 74.1 % ( $\pm$ 16.8 %);  $W = 349$ ,  $p < .001$ ,  $r = .86$ ) (figure 2b). The decrease in shoulder torque was not different between subjects with the dominant side loaded and subjects with the non-dominant side loaded ( $W = 92$ ,  $p = .72$ ,  $r = .08$ ). In other words, trunk restraint increased the mechanical cost that is needed at the shoulder to maintain the final posture. Given the increased arm weight in the loaded condition, we made no comparison between unloaded and loaded conditions.

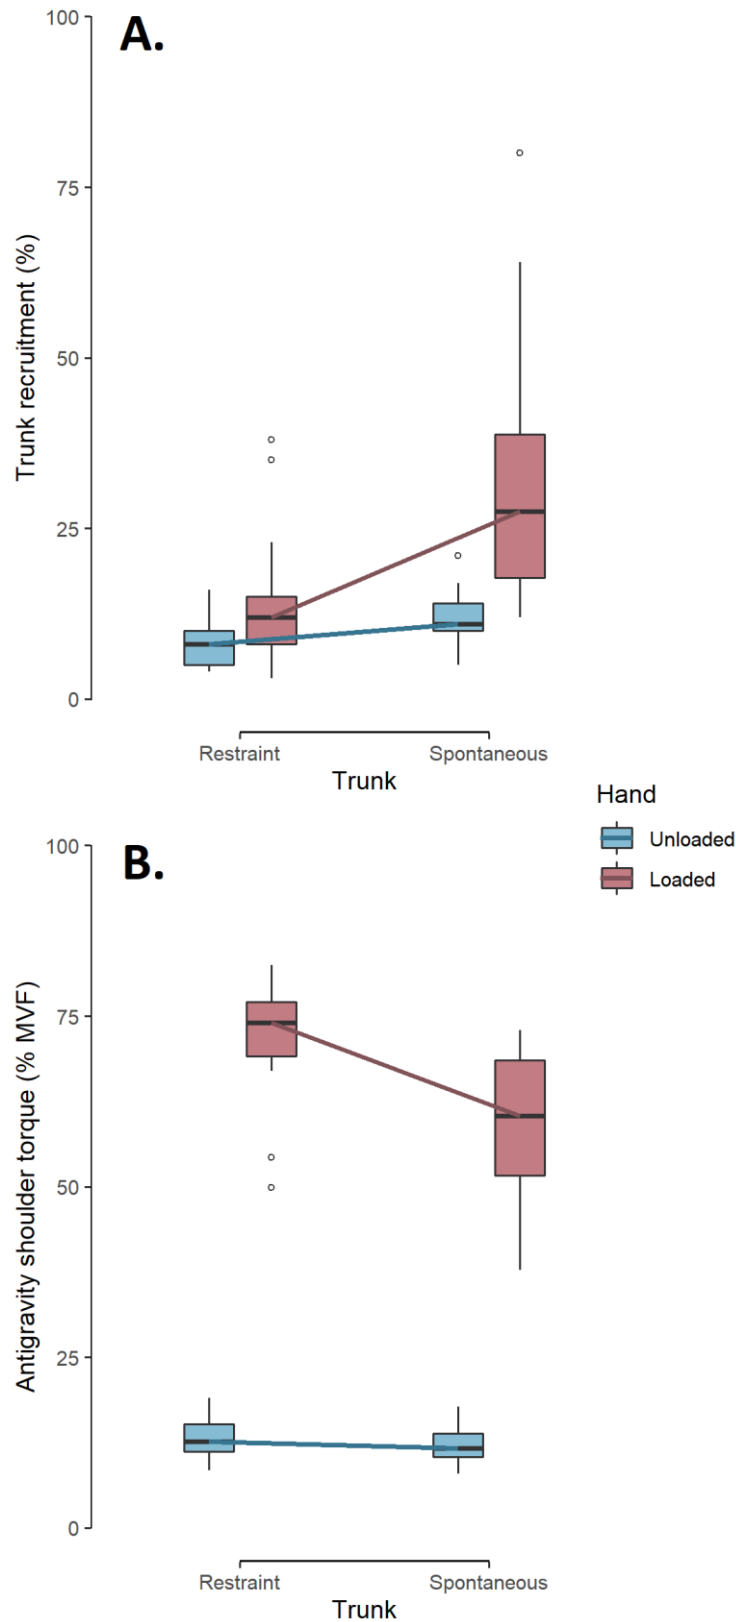

Figure 2. Trunk recruitment (Panel A) and antigravity shoulder torque (Panel B) as a function of trunk restraint and hand load. Trunk recruitment is in percentage of reach length. Antigravity shoulder torque at the final posture is in percentage of maximal voluntary shoulder torque. In each boxplot, the internal horizontal bar represents the median, boxes extend from first to third quartile, whiskers extend from minimal to maximal values excluding outliers and white circles represent outliers. All comparisons are statistically significant. The figure shows that trunk recruitment stays low in the unloaded conditions. When the hand is loaded, trunk recruitment is doubled, and antigravity shoulder torque is decreased by 18% in the spontaneous condition.

| Trunk Hand             | Trunk restraint Unloaded | Spontaneous Unloaded | Trunk restraint Loaded | Spontaneous Loaded |
|------------------------|--------------------------|----------------------|------------------------|--------------------|
| Elbow extension (°)    | 43 (±19)                 | 37 (±13)             | 29 (±16)               | 14 (±19)           |
| Shoulder flexion (°)   | 42 (±10)                 | 41 (±12)             | 39 (±12)               | 31 (±15)           |
| Shoulder adduction (°) | 22 (±11)                 | 19 (±8)              | 11 (±12)               | 12 (±8)            |
| Trunk flexion (°)      | 0 (±0)                   | 1 (±0)               | 1 (±2)                 | 5 (±5)             |
| Trunk rotation (°)     | 4 (±2)                   | 6 (±3)               | 12 (±6)                | 17 (±6)            |

Table 1. Differences in angular rotation between final and initial posture. When the hand is unloaded and the trunk is restrained, the coordination is mainly based on elbow and shoulder use (left of the table). When the hand is loaded or the trunk is free, trunk use increases, which reduces elbow and shoulder use (right of the table).

## 4. Discussion

We tested the hypothesis that, when reaching to grasp an object from a seated position, people recruit the trunk when shoulder torque is too close to maximal. We found that when the hand is loaded to 75% of the maximum antigravity shoulder torque, trunk recruitment increases from 11.0% to 27.5%. By flexing and rotating the trunk, participants spontaneously reduced antigravity shoulder torque from 74.1% to 60.4% of maximum voluntary torque.

### 4.1. Trunk is a crucial component of the reaching coordination

The spontaneous unloaded condition informs about the joint movements that are naturally selected when reaching to grasp an object from a seated position. From a side view, the task requires to move the hand forward. To do this, people combine elbow extension (43°) and shoulder flexion (42°), with no flexion of the trunk (0°). From a top view, the task requires moving the hand towards the middle line. To do this, people combine shoulder adduction (22°), with a small trunk rotation (4°) (Table 1).

In the spontaneous unloaded condition, participants use a combination of elbow extension and shoulder flexion and adduction, but hardly recruit the trunk. This “arm strategy” is in agreement with the theory of optimal control, which says that human movement minimise costs<sup>3</sup>. Indeed, although participants could recruit the trunk, they do not because this would imply moving a large and heavy segment, and therefore to mobilise large muscles. It is more economical to mainly use the arm and forearm segments, which are less heavy and have less inertia than the trunk.

In the spontaneous loaded condition, participants still use a combination of elbow extension and shoulder flexion and adduction, but they do recruit the trunk. This “trunk strategy” decreases shoulder-elbow participation, and therefore minimises antigravity shoulder torque (Figure 2). Indeed, when the arm is loaded and the trunk restricted, antigravity shoulder torque of the final posture is 74% of the maximum, which is a high intensity. According to Diedrichsen *et al.* (2010), when muscles are strongly activated, metabolic processes are not optimised and therefore the need for adenosine triphosphate (ATP) to maintain exertion is high. In addition, signal-dependent noise increases with the intensity of activation<sup>17</sup>, which may affect the precision of the reach. Thus, when the arm is loaded, the “arm strategy” involves a more energy-consuming and imprecise movement. Participants therefore change their coordination so to reduce antigravity shoulder torque. The “trunk strategy” distributes the work over more effectors and thus reduces the load on shoulder muscles. The “trunk strategy” optimises metabolic processes and minimises signal-dependent noise when the weight of the arm is high relative to the strength of the shoulder. This optimisation probably outweighs the metabolic expense required to recruit trunk muscles.

Diedrichsen *et al.* (2010) rename this principle “distribution of work across multiple effectors”. The authors consider that the cost of the task is equal to the squared sum of the motor commands. Indeed,

this cost function is well correlated with ATP consumption and therefore with the effort required. According to this cost function, by penalising high activations, the distribution principle would minimise the total cost of the movement, and therefore minimise the required effort. Our results are consistent with the conclusions of Wang & Dounskaia (2012). They show that increasing arm weight accentuates, and thus makes visible the minimisation of muscular effort. Thus, when the arm is unloaded, effort minimisation is still at work but is less noticeable.

Here, we confirm the idea of Peeters *et al.* (2018) and Fuller *et al.* (2013) that trunk movement occurs when the shoulder has to develop a too great strength in relation to its capacity. This means that in addition to stabilising the arm and regulating the reachable distance<sup>8,19</sup>, trunk movements emerge to avoid high shoulder torques.

Limitation: Participants did the reaching movement without holding a dumbbell in the unloaded condition. So, it is possible that some of the coordination differences are due to the difference in hand orientation between the dumbbell (loaded) and the non-dumbbell (unloaded) condition. However, in order to avoid this bias, the target was designed not to interfere with the movement performed with the dumbbell, and participants were instructed to hit the target with the side of their thumb, which theoretically produces a strictly similar movement, whether or not the participant is holding the dumbbell.

## 4.2. Implications for optimal control

The theory of optimal control states that movement coordination is performed to meet the constraints of the task while minimising a cost function<sup>20</sup>. Objective cost functions were first explored to minimise a mechanical cost<sup>21,22</sup>, but according to Loeb (2012), cost functions not based on subjective feelings make no sense in a neurobiological system. More human-oriented functions were then developed, such as minimum neuromuscular effort<sup>24</sup>, minimum metabolic cost<sup>25,26</sup> or maximum comfort<sup>27</sup>. Finally, other functions combine objective and subjective effort<sup>28</sup> or introduce modulation by individual traits<sup>4,29</sup>. In the face of this diversity, there is currently no consensus on the list of ingredients to include in the cost function.

Here we show that in a seated reaching task, when the arm is heavy relative to the shoulder strength, healthy participants change their coordination to relieve the shoulder and thus avoid too much antigravity shoulder torque. By recruiting the trunk, the antigravity shoulder torque drops of about 20% of maximum achievable. Despite a great variability between the participants, this result shows that the strategy of coordination is directly adapted to the constraints to avoid a shoulder torque greater than about 60%, i.e. to guarantee a shoulder torque reserve of 40%. When pushed to their maximum in the trunk restraint condition, people are able to voluntarily reduce the reserve to 25%, but not less (figure 3). This suggests that the spontaneous 40% reserve is the sum of a mobilizable comfort reserve of 15%, and non-mobilizable safety reserve of 25%. Keeping a reserve of strength is tantamount to the safety margin when grasping an object<sup>30</sup>, and more generally, keeping safety reserve is a behavioural strategy adopted by humans to be able to react to unexpected perturbations, which is mandatory to succeed in the task every time.



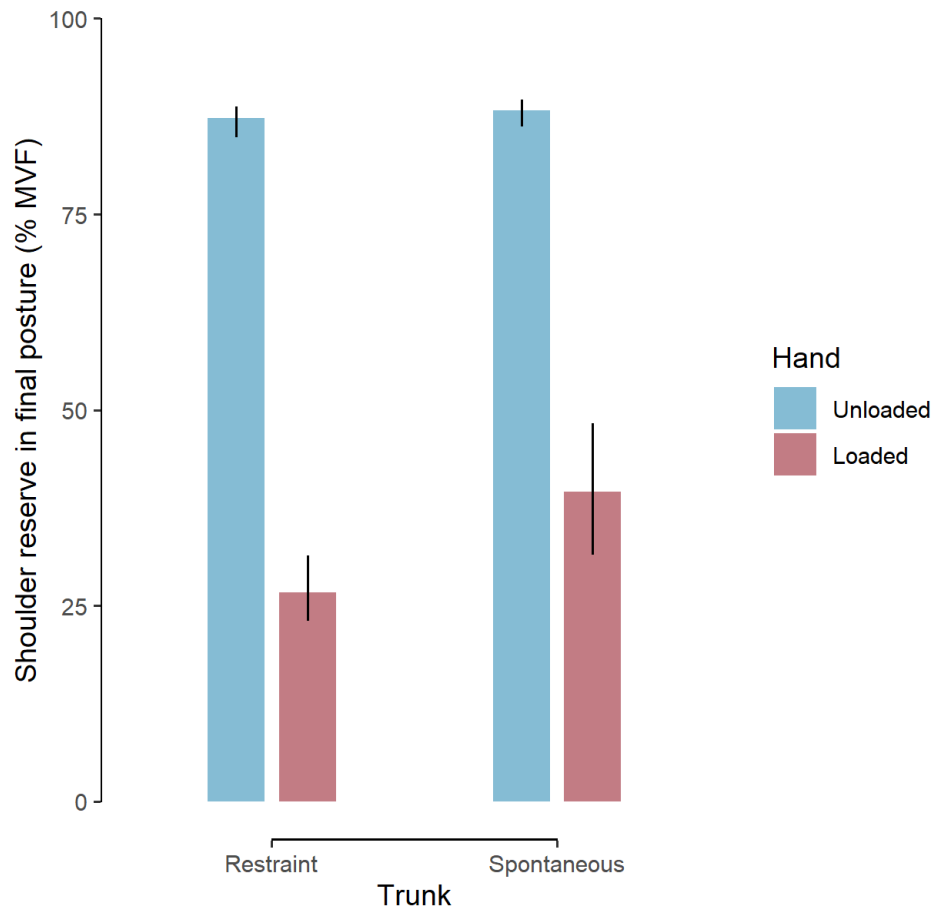

Figure 3. Shoulder reserve in final posture as a function of trunk restraint and hand load. Shoulder reserve is in percentage of maximal antigavity shoulder torque. In each barplot, the top of the bar represents the median, error bar extends from the first to the third quartile. All comparisons are statistically significant. The figure shows that shoulder reserve stays high in the unloaded conditions. When the hand is loaded and the trunk is restrained, shoulder reserve is considerably reduced. Shoulder reserve is increased by 53% in the spontaneous condition.

Although most of the current cost functions are linked to human effort, they are generally derived from experiments where participants spontaneously perform far from their limits<sup>29,31</sup>. Here we demonstrate that, to better model the reaching movement where people are pushed towards their maximum, realistic cost functions should penalise too strong activations, and likely do so in a nonlinear fashion, to spontaneously maintain a reserve of about 40% and never go lower than 25%.

Our results suggest that a reserve of about 40% of maximal force is the limit of acceptable activation without spontaneously recruiting a novel degree of freedom.

Limitations and future work: If this work lays the foundations for understanding the activation threshold beyond which the effort is avoided, it remains preliminary. First, the antigavity torque at the shoulder is only estimated statically for the final posture, which does not fully reflect the actual activation of the shoulder muscles. Torques could be estimated dynamically during the reach and muscle activations could be investigated using EMG analysis. Second, further experiments could measure how trunk recruitment increases as a function of shoulder torque, for example to get a picture of the non-linearity of this relation. Third, the reaching task studied here is very stereotypical. Further work could measure the evolution of coordination in more ecological tasks, with greater or lesser spatial accuracy requirements.

### 4.3. Perspectives for stroke research

Our result that trunk recruitment is the optimal solution when shoulder torque is too close to maximal has strong consequence for the interpretation of movement disorders. The most disabling factor after a stroke is muscle weakness in the hemiparetic arm<sup>32</sup>. In other words, after a stroke, the weight of the arm is too heavy for the available strength of the shoulder muscles<sup>33,34</sup>. As a result, people with stroke are close to maximum neuromuscular activation during a reaching movement<sup>35</sup>. After a stroke, it is likely that the principles governing sensorimotor control and learning are the same<sup>36,37</sup>. Hence, with the very same control policy in the face of an atypical body, the emerging coordination is atypical<sup>38</sup>. By recruiting the trunk, patients follow the typical control policy: they reduce the necessary shoulder torque and thus minimise effort. This interpretation is consistent with empirical results showing that arm weight support decreased neuromuscular activation of the shoulder<sup>39,40</sup>, and so increased the reachable space of the patients<sup>41,42</sup>. This confirms that the ability to lift the arm is a strong limiting factor when reaching after a stroke.

When the available force is limited, it may be optimal to freely use all the available degrees of freedom instead of spending more attention, effort, energy to perform the task more “normally” (*i.e.* with the “arm strategy”). Thus, trunk compensation by stroke victims is not ineluctably a “bad synergy” resulting from a pathological synergy or from an impaired control<sup>43,44</sup>, but could instead testify that stroke movement continue to follow optimal control principles, but with different constraints (such as reduced maximum shoulder torque or greater noise), as claimed in other diseases<sup>38</sup>. Further research is needed to confirm that both people with and without stroke recruit their trunk when the arm is too heavy for the available shoulder force. For example, experimentally reducing the weight of the arm of post-stroke individuals should result in a proportional reduction in trunk compensation.

Our results also have consequences for therapists, because therapy aimed at increasing the maximum torque at the shoulder is likely to be beneficial. Yet, this kind of therapy runs counter to current rehabilitation strategies such as robotics, which does not require high-intensity activation of the shoulder muscles, and therefore has little effect on arm strength and upper extremity capacity<sup>45</sup>. Since movement repertoire is limited precisely because of a lack of strength, it may be worth considering training that emphasises strength in addition to conventional therapies<sup>46</sup>.

However, care must be taken not to confuse the strength reserve with what we call a “coordination reserve”. The latter is a form of neuroplastic cognitive reserve that explains “the disjunction between the degree of brain damage and its clinical outcome”<sup>47</sup> and that can be drawn upon to change the coordination through learning<sup>48,49</sup>.

## 5. Conclusion

Our experiment shows that, in young healthy persons reaching at a target while seated, trunk recruitment becomes visible when the participant faces antigravity force limitations at the shoulder. The recruitment of the trunk is an optimal solution to keep the activation of the shoulder muscles under 60% of their maximum, which supports the principle of “distribution between effectors”. More generally, our results suggest that all joints in the kinematic chain actively participate in the movement, but that the amplitude of their recruitment is mediated by force constraints: energy-consuming joints are recruited only when necessary, to minimise the use of the force reserve of the other joints.

## Data availability

The raw datasets generated during the current study are available in the Open Science Framework repository: <https://osf.io/r3xcu/>

## Code availability

The code generated during the current study is available in the Open Science Framework repository:

<https://osf.io/r3xcu/>

## References

1. Bernstein. *The co-ordination and regulation of movements*. (Pergamon Press, 1967).
2. Jeannerod, M. Intersegmental coordination during reaching at natural visual objects. *Attention and performance IX*, 153–169 (1981).
3. Todorov, E. & Jordan, M. I. Optimal feedback control as a theory of motor coordination. *Nature Neuroscience* **5**, 1226–1235 (2002).
4. Rigoux, L. & Guigon, E. A Model of Reward- and Effort-Based Optimal Decision Making and Motor Control. *PLOS Computational Biology* **8**, e1002716 (2012).
5. Diedrichsen, J., Shadmehr, R. & Ivry, R. B. The coordination of movement: optimal feedback control and beyond. *Trends in Cognitive Sciences* **14**, 31–39 (2010).
6. *Biomechanics of Anthropomorphic Systems*. vol. 124 (Springer International Publishing, 2019).
7. Prilutsky, B. I. & Zatsiorsky, V. M. Optimization-Based Models of Muscle Coordination. *Exerc Sport Sci Rev* **30**, 32 (2002).
8. Kaminski, T. R., Bock, C. & Gentile, A. M. The coordination between trunk and arm motion during pointing movements. *Experimental Brain Research* **106**, (1995).
9. Cirstea, M. C. & Levin, M. F. Compensatory strategies for reaching in stroke. *Brain* **123**, 940–953 (2000).
10. Levin, M. F., Liebermann, D. G., Parmet, Y. & Berman, S. Compensatory Versus Noncompensatory Shoulder Movements Used for Reaching in Stroke. *Neurorehabil Neural Repair* **30**, 635–646 (2016).
11. Peeters, L. H. C., de Groot, I. J. M. & Geurts, A. C. H. Trunk involvement in performing upper extremity activities while seated in neurological patients with a flaccid trunk – A review. *Gait & Posture* **62**, 46–55 (2018).
12. Fuller, J. R., Fung, J. & Côté, J. N. Posture-movement responses to stance perturbations and upper limb fatigue during a repetitive pointing task. *Human Movement Science* **32**, 618–632 (2013).
13. Bakhti, K. K. A., Mottet, D., Schweighofer, N., Froger, J. & Laffont, I. Proximal arm non-use when reaching after a stroke. *Neuroscience Letters* **657**, 91–96 (2017).
14. De Leva, P. Adjustments to zatsiorsky-seluyanov's segment inertia parameters. *Journal of Biomechanics* (1996).
15. Benjamini, Y. & Hochberg, Y. Controlling the False Discovery Rate: A Practical and Powerful Approach to Multiple Testing. *Journal of the Royal Statistical Society: Series B (Methodological)* **57**, 289–300 (1995).
16. R. Rosenthal, H. Cooper, & L. Hedges. Parametric measures of effect size. in *The handbook of research synthesis*. 231–244 (1994).
17. Harris, C. M. & Wolpert, D. M. Signal-dependent noise determines motor planning. *Nature* **394**, 780 (1998).
18. Wang, W. & Dounskaia, N. Load emphasizes muscle effort minimization during selection of arm movement direction. *Journal of NeuroEngineering and Rehabilitation* **9**, 70 (2012).
19. Robertson, J. V. G. & Roby-Brami, A. The trunk as a part of the kinematic chain for reaching movements in healthy subjects and hemiparetic patients. *Brain Research* **1382**, 137–146 (2011).
20. Todorov, E. Optimality principles in sensorimotor control. *Nature Neuroscience* **7**, 907 (2004).
21. Nelson, W. L. Physical principles for economies of skilled movements. *Biological Cybernetics* **46**, 135–147 (1983).
22. Uno, Y., Kawato, M. & Suzuki, R. Formation and control of optimal trajectory in human multijoint arm movement. *Biological Cybernetics* **61**, (1989).
23. Loeb, G. E. Optimal isn't good enough. *Biol Cybern* **106**, 757–765 (2012).

24. Guigon, E., Baraduc, P. & Desmurget, M. Computational Motor Control: Redundancy and Invariance. *Journal of Neurophysiology* **97**, 331–347 (2007).
25. Praagman, M., Chadwick, E. K. J., van der Helm, F. C. T. & Veeger, H. E. J. The relationship between two different mechanical cost functions and muscle oxygen consumption. *Journal of Biomechanics* **39**, 758–765 (2006).
26. Shadmehr, R., Huang, H. J. & Ahmed, A. A. A Representation of Effort in Decision-Making and Motor Control. *Current Biology* **26**, 1929–1934 (2016).
27. Cruse, H., Wischmeyer, E., Brüwer, M., Brockfeld, P. & Dress, A. On the cost functions for the control of the human arm movement. *Biol. Cybern.* **62**, 519–528 (1990).
28. Wang, C., Xiao, Y., Burdet, E., Gordon, J. & Schweighofer, N. The duration of reaching movement is longer than predicted by minimum variance. *Journal of Neurophysiology* **116**, 2342–2345 (2016).
29. Berret, B., Castanier, C., Bastide, S. & Deroche, T. Vigour of self-paced reaching movement: cost of time and individual traits. *Scientific Reports* **8**, 1–14 (2018).
30. Danion, F. Grip force safety margin in rock climbers. *International journal of sports medicine* **29**, (2008).
31. Berret, B., Chiovetto, E., Nori, F. & Pozzo, T. Evidence for Composite Cost Functions in Arm Movement Planning: An Inverse Optimal Control Approach. *PLOS Computational Biology* **7**, e1002183 (2011).
32. Canning, C. G., Ada, L., Adams, R. & O'Dwyer, N. J. Loss of strength contributes more to physical disability after stroke than loss of dexterity. *Clin Rehabil* **18**, 300–308 (2004).
33. Ada, D. L., O'Dwyer, N., Ada, D. L., O'Dwyer, N. & O'Neill, E. Relation between spasticity, weakness and contracture of the elbow flexors and upper limb activity after stroke: An observational study. *Disability and Rehabilitation* **28**, 891–897 (2006).
34. Daniel Bourbonnais, Sharyn Vanden Noven. Weakness In Patients With Hemiparesis. *The American Journal of Occupational Therapy* (1989).
35. McCrea, P. H., Eng, J. J. & Hodgson, A. J. Saturated Muscle Activation Contributes to Compensatory Reaching Strategies After Stroke. *Journal of Neurophysiology* **94**, 2999–3008 (2005).
36. Kitago, T. & Krakauer, J. W. Motor learning principles for neurorehabilitation. in *Handbook of Clinical Neurology* vol. 110 93–103 (Elsevier, 2013).
37. Mottet, D., van Dokkum, L. E. H., Froger, J., Gouaich, A. & Laffont, I. Trajectory formation principles are the same after mild or moderate stroke. *PLoS ONE* **12**, e0173674 (2017).
38. Latash, M. L. & Anson, J. G. What are “normal movements” in atypical populations? *Behavioral and Brain Sciences* **19**, 55–68 (1996).
39. Coscia, M. *et al.* The effect of arm weight support on upper limb muscle synergies during reaching movements. *J NeuroEngineering Rehabil* **11**, 22 (2014).
40. Runnalls, K. D., Ortega-Auriol, P., McMorland, A. J. C., Anson, G. & Byblow, W. D. Effects of arm weight support on neuromuscular activation during reaching in chronic stroke patients. *Exp Brain Res* **237**, 3391–3408 (2019).
41. Dewald, J. P. A., Sheshadri, V., Dawson, M. L. & Beer, R. F. Upper-Limb Discoordination in Hemiparetic Stroke: Implications for Neurorehabilitation. *Topics in Stroke Rehabilitation* **8**, 1–12 (2001).
42. Sukal, T. M., Ellis, M. D. & Dewald, J. P. A. Shoulder abduction-induced reductions in reaching work area following hemiparetic stroke: neuroscientific implications. *Exp Brain Res* **183**, 215–223 (2007).
43. Dewald, J. P. A., Pope, P. S., Given, J. D., Buchanan, T. S. & Rymer, W. Z. Abnormal muscle coactivation patterns during isometric torque generation at the elbow and shoulder in hemiparetic subjects. *Brain* **118**, 495–510 (1995).
44. Subramanian, S. K. *et al.* Motor-Equivalent Intersegmental Coordination Is Impaired in Chronic Stroke. *Neurorehabil Neural Repair* **34**, 210–221 (2020).
45. Veerbeek, J. M., Langbroek-Amersfoort, A. C., van Wegen, E. E. H., Meskers, C. G. M. & Kwakkel, G. Effects of Robot-Assisted Therapy for the Upper Limb After Stroke: A Systematic Review and Meta-analysis. *Neurorehabil Neural Repair* **31**, 107–121 (2017).

46. Hill, T. R. *et al.* Maximal Strength Training Enhances Strength and Functional Performance in Chronic Stroke Survivors. *American Journal of Physical Medicine & Rehabilitation* **91**, 393–400 (2012).
47. Stern, Y. Cognitive reserve. *Neuropsychologia* **47**, 2015–2028 (2009).
48. Cramer, S. C. *et al.* Harnessing neuroplasticity for clinical applications. *Brain* **134**, 1591–1609 (2011).
49. Winstein, C. J. & Kay, D. B. Translating the science into practice. in *Progress in Brain Research* vol. 218 331–360 (Elsevier, 2015).

## Acknowledgements

This study was supported by the LabEx NUMEV (ANR-10-LABX-0020) within the I-SITE MUSE. We thank Victor Barradas and Nicolas Schweighofer for their comments on the article. We acknowledge Germain Faily for drawing the schema of the experimental conditions.

## Authors' contributions

GF designed the protocol, recorded and analysed the data, wrote the first version of the manuscript. DM and JF assisted GF in designing the protocol, analysing the data and provided guidance for improving the manuscript. SP assisted GF in setting up the protocol, recording the data and improving the manuscript. All authors accepted the latest version of the manuscript.

## Additional information

### Competing interests

The authors declare that they have no competing interests.
